1           **Kinematic signatures of learning that emerge in a real-world motor skill task**

2                           Shlomi Haar<sup>1,3\*</sup>, Camille M. van Assel<sup>1</sup> & A. Aldo Faisal<sup>1,2,3,4,5\*</sup>

- 3           1. Brain and Behaviour Lab: Dept. of Bioengineering, Imperial College London, London, UK  
4           2. Dept. of Computing, Imperial College London, London, UK  
5           3. Behaviour Analytics Lab, Data Science Institute, Imperial College London, London, UK  
6           4. UKRI CDT in AI for Healthcare, Imperial College London, London, UK  
7           5. MRC London Institute of Medical Sciences, London, UK

8  
9           \* **Corresponding authors:** aldo.faisal@imperial.ac.uk (AAF) and s.haar@imperial.ac.uk (SH)  
10

11           **Abbreviated title:** Motor learning in a real-world task

12           **Keywords:** motor learning, motor skill, real-world, full-body movement, movement variability, motor  
13           neuroscience, motor coordination

14           **Declaration of Interests:** The authors declare no competing financial interests.

15           **Contributions:** SH and AAF conceived and designed the study; SH, CVA and AAF developed the  
16           experimental setup; SH and CVA acquired and analyzed the data; SH and AAF interpreted the data; SH  
17           drafted the paper; SH and AAF revised the paper

18           **Acknowledgements:** We thank our participants for taking part in the study and Marlene Gonzalez for her  
19           contribution to the data collection. We acknowledge the technical support by Alex Harston and Chaiyawan  
20           Auepanwiriyaikul. We also thank Alex Harston for helpful comments on the manuscript. The study was  
21           enabled by financial support to a Royal Society-Kohn International Fellowship (NF170650; SH & AAF) and  
22           by eNHANCE (<http://www.enhance-motion.eu>) under the European Union's Horizon 2020 research and  
23           innovation programme grant agreement No. 644000 (SH & AAF).

## 24 **Abstract**

25           The neurobehavioral mechanisms of human motor-control and learning evolved in free  
26 behaving, real-life settings, yet to date is studied in simplified lab-based settings. We demonstrate  
27 the feasibility of real-world neuroscience, using wearables for naturalistic full-body motion-  
28 tracking and mobile brain-imaging, to study motor-learning in billiards. We highlight the  
29 similarities between motor-learning in-the-wild and classic toy-tasks in well-known features, such  
30 as multiple learning rates, and the relationship between task-related variability and motor learning.  
31 Studying in-the-wild learning enable looking at global observables of motor learning, as well as  
32 relating learning to mechanisms deduced from reductionist models. The analysis of the velocity  
33 profiles of all joints enabled in depth understanding of the structure of learning across the body.  
34 First, while most of the movement was done by the right arm, the entire body learned the task, as  
35 evident by the decrease in both inter- and intra- trial variabilities of various joints across the body  
36 over learning. Second, while over learning all subjects decreased their movement variability and  
37 the variability in the outcome (ball direction), subjects who were initially more variable were also  
38 more variable after learning, supporting the notion that movement variability is an individual trait.  
39 Lastly, when exploring the link between variability and learning over joints we found that only the  
40 variability in the right elbow supination shows significant correlation to learning. This demonstrates  
41 the relation between learning and variability: while learning leads to overall reduction in movement  
42 variability, only initial variability in specific task relevant dimensions can facilitate faster learning.

43

## 44 **Author Summary**

45           This study addresses a foundational problem in the neuroscience: studying the mechanisms  
46 of motor control and learning in free behaving, real-life tasks, where our brains and bodies operate  
47 in on a daily basis and which contains the richness of stimuli and responses for what our nervous  
48 system evolved. We used the competitive sports of pool billiard to frame an unconstrained real-  
49 world skill learning experiment which is amenable to predictive modelling and understanding. Our  
50 data-driven approach unfolds the structure and complexity of movement, variability, and motor-  
51 learning, highlighting that real-world motor-learning affects the whole body, changing motor-  
52 control from head to toe. Crucially, we are enabling novel hypothesis driven experimental  
53 approaches to study behavior where it matters most - in real life settings.

## 54 Introduction

55 Motor learning is a key feature of our development and daily lives, from a baby learning  
56 to roll, to an adult learning a new sport, or a patient undergoing rehabilitation after a stroke. The  
57 process of learning a real-world motor skill is usually long and complex, and difficult to quantify.  
58 As a result, real-world motor learning is rarely studied, and most of the motor learning literature  
59 focuses on relatively simple tasks, performed in a lab setup or an MRI scanner, such as force-field  
60 adaptations (e.g. Diedrichsen et al., 2005; Howard et al., 2015; Shadmehr and Mussa-Ivaldi, 1994;  
61 Smith et al., 2006), visuomotor perturbations (e.g. Haar et al., 2015; Krakauer et al., 2000; Mazzoni  
62 and Krakauer, 2006; Taylor et al., 2014), and sequence-learning of finger tapping or pinching tasks  
63 (e.g. Clerget et al., 2012; Ma et al., 2011; Reis et al., 2009; Yokoi et al., 2018).

64 These reductionistic tasks enable to isolate specific features of the motor learning and  
65 tackle them individually. While this plays an important role in our understanding of sensorimotor  
66 control and learning, it addresses a very restricted range of behaviors that do not capture the full  
67 complexity of real-world motor control and may overlook fundamental principles of motor control  
68 and learning in real-life (Faisal et al., 2010; Ingram and Wolpert, 2011; Wolpert et al., 2011). It is  
69 only in natural behavioral settings that neuroscientific mechanisms are subject to evolutionary  
70 selection pressures and it is the operation in these contexts for which the nervous system has been  
71 designed (Hecht et al., 2014). Over the past decade there were few important efforts in this  
72 direction. One line of research devised more complex tasks for skill learning (e.g. Abe and Sternad,  
73 2013; Cohen and Sternad, 2009; Shmuelof et al., 2012), but those were still computer based toy-  
74 tasks which try to emulate real-world tasks. The other line used actual real-world tasks such as  
75 juggling (e.g. van Beers et al., 2013; Hecht et al., 2014; Ono et al., 2015; Sampaio-Baptista et al.,  
76 2014, 2015; Scholz et al., 2009), but these studies analyzed only anatomical and functional MRI  
77 changes following learning and did not address behavior or neural activity during the learning  
78 process.

79 Here we are taking a novel data-driven approach to study behavior where it matters most –  
80 in natural real-life settings. The paradigm in which we study real-world motor learning is the game  
81 of pool table billiards. Billiards is a real-world task ideally suited to neurobehavioral study as  
82 motion tracking in terms of movement in space, the natural constraints of game playing, and  
83 divisibility into trials captures the style of reductionistic lab-based motor learning tasks. Billiards  
84 is also a natural task which is complex and involves many different sub-tasks (precision, alignment,  
85 ballistic movements, high-level sequential planning) which requires complex skills. To tackle the  
86 complexity of the high dimensional task space of this real-world task, we applied naturalistic  
87 approaches and developed a neurobehavioral database of real-world motor learning behavior. This  
88 includes the full body movement during the entire learning period, as well as the measurements of  
89 task performance (balls movement on the table). This enabled us to quantify the trends of changes

90 in each of them separately during the entire learning process, and to look for correlations between  
91 the changes in the body movement and the performance in the task.

92 We structured the results as follows: We ground our results in previous work on  
93 reductionistic lab tasks, to show that our unconstrained task and its task goal (directional error of  
94 the target ball relative to the pocket it is meant to go in) displays the well-known features of human  
95 motor learning. We then characterize full-body movement structure during the task, and how  
96 learning changes the kinematics of all joints over trials. Next, we compare across subjects to map  
97 their performance, learning rates, and motor variability, and how initial variability and learning  
98 rates are linked.

## 99 **Results**

100 30 right-handed volunteers, with little to no previous experience playing billiards,  
101 performed 300 repeated trials (6 sets of 50 trials each with short breaks in-between) where the cue  
102 ball and target ball were placed in the same locations, and subjects were asked to shoot the target  
103 ball towards the far-left corner pocket (Figure 1A). During the entire learning process, we recorded  
104 the subjects' full body movements with a 'suit' of inertial measurement units (IMUs; Figure 1B),  
105 and the balls on the pool table were tracked with a high-speed camera to assess the outcome of each  
106 trial (Figure 1C).

### 107 **Movement and Learning in a real-world pool task**

108 The ball tracking data showed a double exponential learning curve for the decay in the  
109 directional error of the target ball (relative to the direction from its origin to the center of the target  
110 pocket) over trials (Figure 1D). The direction of the initial trials error was consistent across subjects  
111 as they tended to hit the center of the target ball and shot it forward towards the center of the table.  
112 For measuring success rates and intertrial variability we divided the trials into blocks of 25 trials  
113 (each experimental set of 50 trials was divided to two blocks to increase the resolution in time).  
114 The learning curve over blocks (Figure 1E) emphasized the reduction in the inter-subject variability  
115 during learning (decreasing error bars). The success rate over blocks (percentage of successful trials  
116 in each block; Figure 1F) showed similar learning to the directional error. The learning was also  
117 evident in the intertrial variability in the shooting direction which decayed over learning (Figure  
118 1G). Since learning also occurred within a block (especially during the first block) and the  
119 variability might be driven by the learning gradient, we corrected for it by calculating intertrial  
120 variability over the residuals from a regression line fitted to the ball direction in each block (while  
121 the learning curve is exponential, within the small blocks of 25 trials it is almost linear). This  
122 corrected intertrial variability showed the same pattern (Figure 1H). Overall, the task performance  
123 data suggested that subjects reached their peak performance on the fifth experimental set (blocks  
124 9-10, trials 200-250) and are doing the same (or even slightly worse) on the last experimental set

125 (blocks 11-12, trials 250-300). Thus, we refer to the last two experimental sets (blocks 9-12, trials  
 126 201-300) as the ‘learning plateau’.

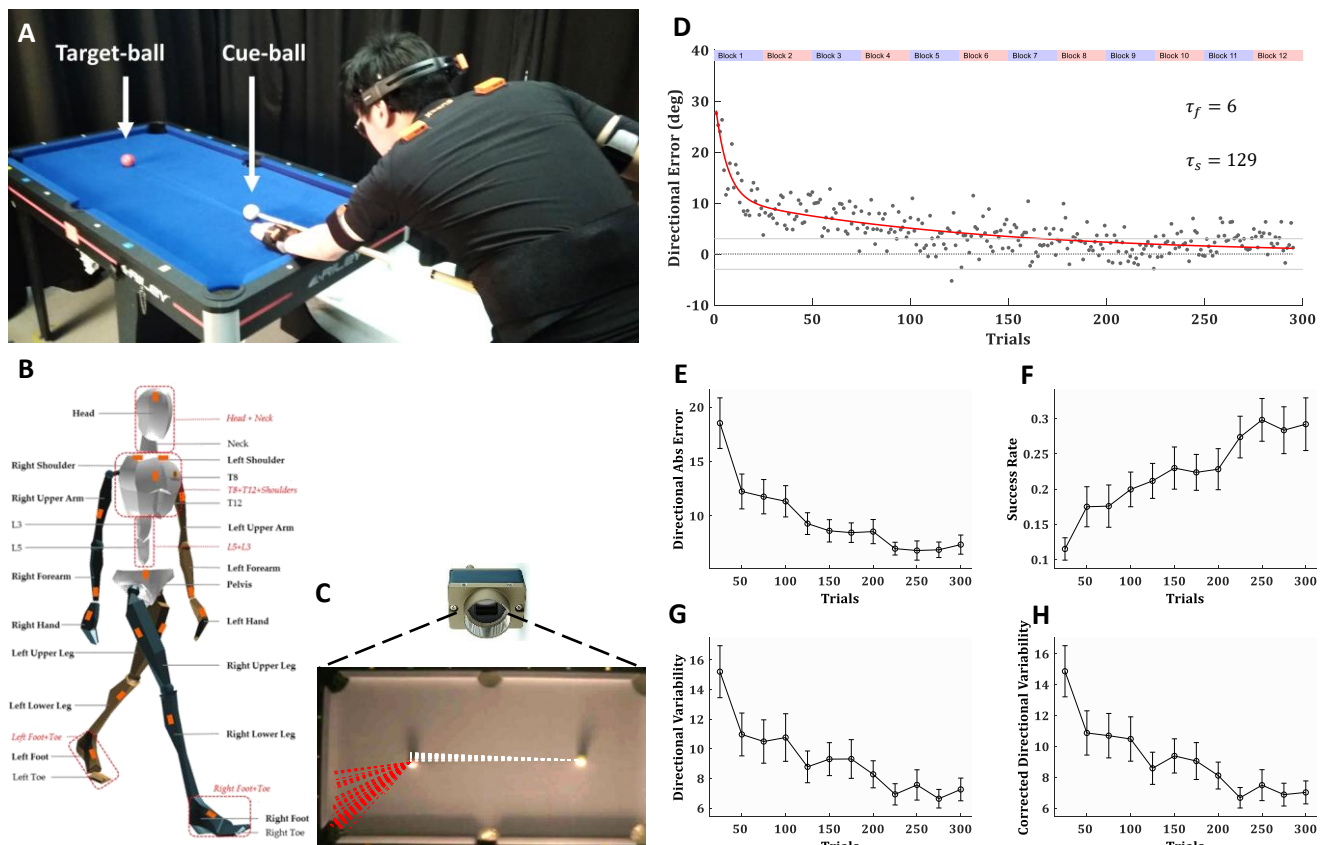

**Figure 1. Experimental setup and task performance.** (A) 30 right-handed healthy subjects performed 300 repeated trials of billiards shots of the target (red) ball towards the far-left corner. (B) Full body movement was recorded with a ‘suit’ of 17 wireless IMUs (Xsens MVN Awinda). (C) The pool balls were tracked with a high-speed camera. Dashed lines show the trajectories of the cue (white) and target (red) balls over 50 trials of an example subject. (D) The trial-by-trial directional error of the target-ball (relative to the direction from its origin to the centre of the target pocket), averaged across all subjects, with a double-exponential fit (red curve). Grey lines mark the range of successful trials. (E) The mean absolute directional error of the target-ball. (F) The success rates. (G) directional variability. and (H) directional variability corrected for learning (see text). (E-H) presented over blocks of 25 trials, averaged across all subjects, error bars represent SEM.

127

128 The full body movements were analyzed over the velocity profiles of all joints, and not the  
 129 joint angles profiles, as those are less sensitive to potential drifts in the IMUs and have proven to  
 130 be more robust and reproducible across subjects in natural behavior (Thomik, 2016). In the current  
 131 data we can also see this robustness across trials (Figure 2A). The covariance matrix over the  
 132 velocity profiles of the different joints, averaged across the initial block trials of all subjects, showed  
 133 that most of the variance in the movement is in the right arm, and specifically in the right shoulder  
 134 (Figure 2B). This is a signature for the naivety of the subjects, as pool billiards guide books  
 135 emphasize that the shooting movement should be from the elbow down while the shoulder should  
 136 be kept still. The covariance of the velocity profiles averaged across the initial block of the learning  
 137 plateau (trials 201-225) showed similar structure with an overall decrease relative to the initial trials  
 138 but an increase in the variance of right elbow rotation (Figure 2C).

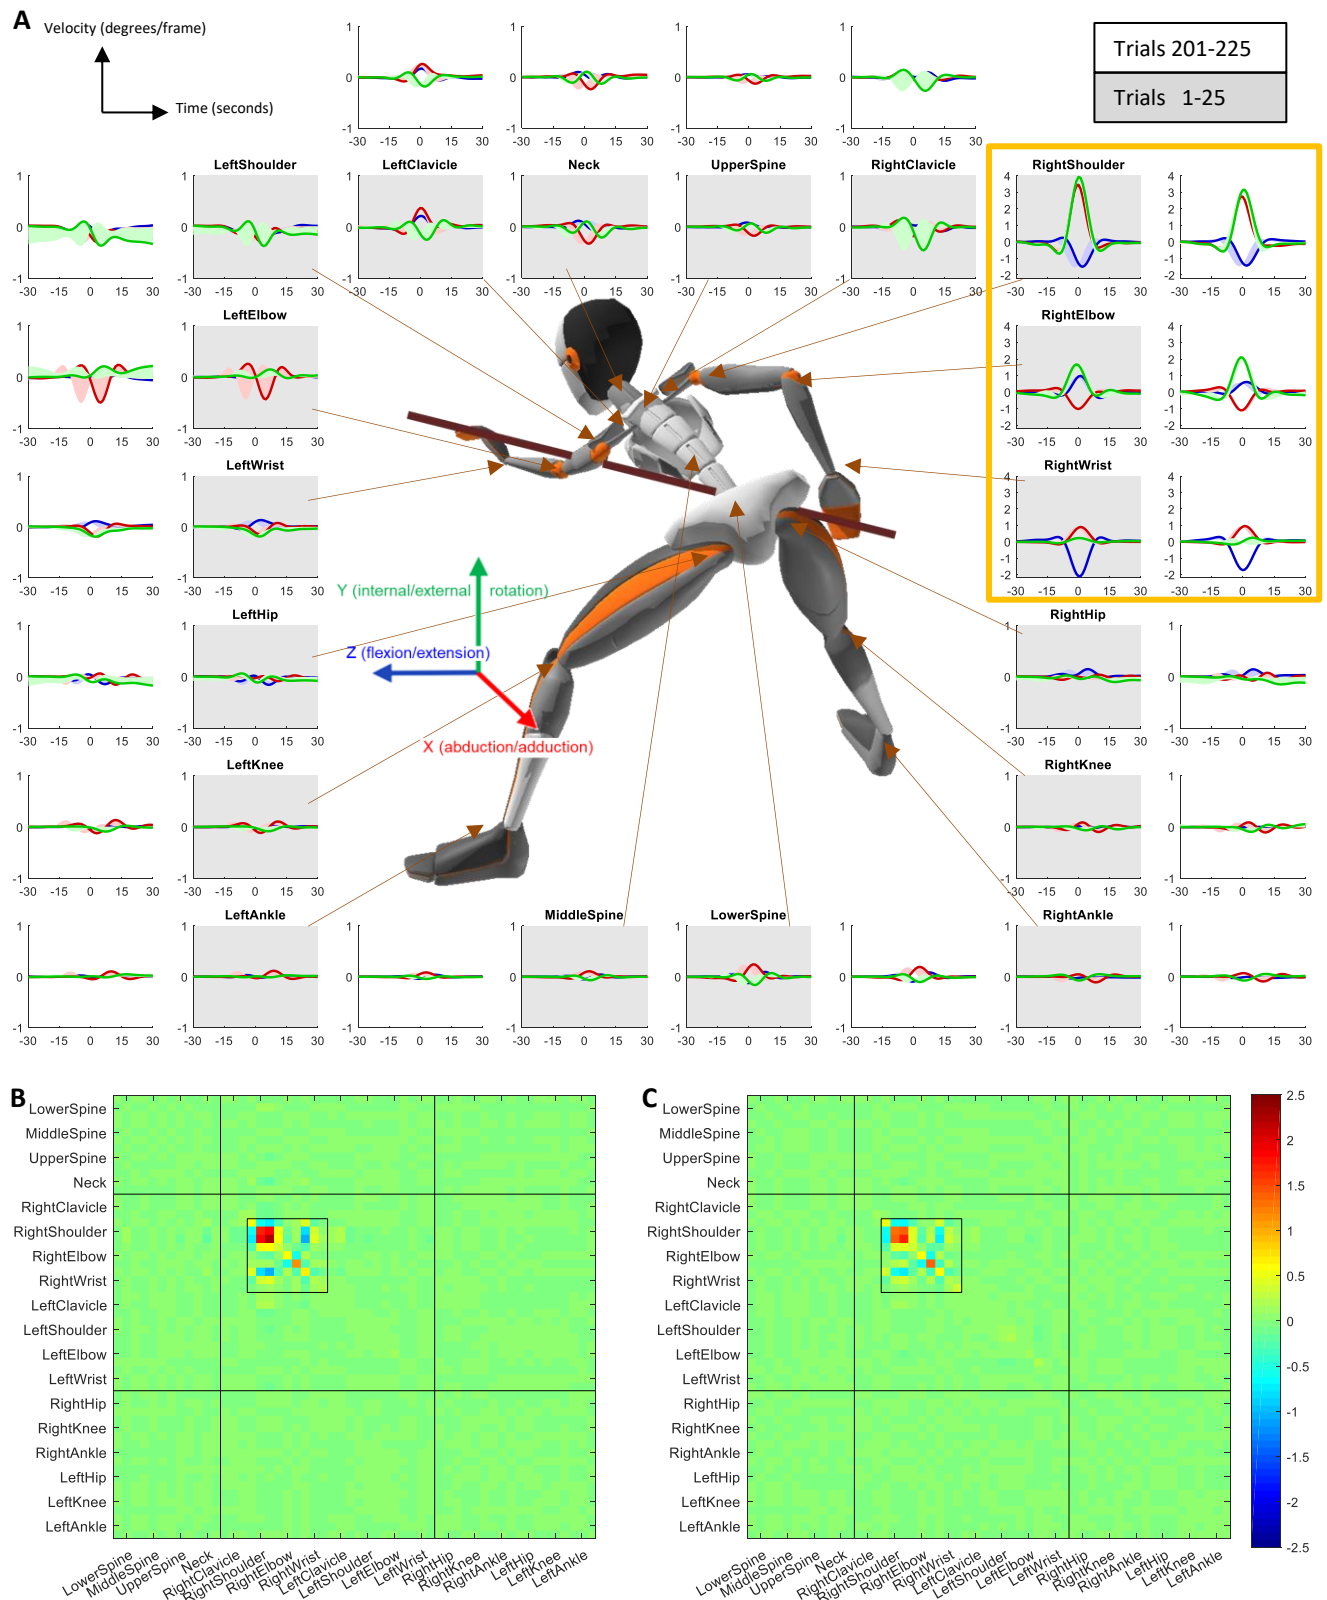

**Figure 2. Velocity profiles and covariance.** (A) Velocity profiles in 3 degrees of freedom (DoF) for each joint (blue: flexion/extension, red: abduction/adduction; green: internal/external rotation) averaged across subjects and trials over the first block of trials (1-25) in the inner circle (grey background) and the first block after learning plateau (201-225) in the outer circle (white background). The joints of the right arm, which do most of movement in the task, are highlighted in orange box. (B,C) The variance covariance matrix of the velocity profiles of all joints averaged across subjects and trials (B) over the initial block (1-25) and (C) first block after learning plateau (201-225). The order of the DoF for each joint is: flexion/extension, abduction/adduction, internal/external rotation.

140 On the group level, the velocity profiles of all joints (including the joints of the right arm  
141 that carry most of the movement variance) showed only minor changes following learning. For  
142 example, the flexion/extension of the right elbow showed a decrease in velocity from the initial  
143 trials to the trials of the learning plateau (Figure 2A).

144 The generalized variance (GV; the determinant of the covariance matrix (Wilks, 1932))  
145 over the velocity profiles of all joints increased fast over the first ~30 trials and later decreased  
146 slowly (Figure 3A), suggesting active control of the exploration-exploitation trade-off. The  
147 covariance over the initial block, the block over the peak GV, and first block after learning plateau  
148 (Figure 3B), shows that the changes in the GV were driven by an increase in the variance of all  
149 DoFs of the right shoulder, and the negative covariance between the abduction/adduction and  
150 internal/external rotation of the right shoulder to the flexion/extension of the right shoulder and  
151 wrist. The internal/external rotation of the right elbow showed a continuous increase in its variance,  
152 which did not follow the trend of the GV. Principal component analysis (PCA) across joints for the  
153 velocity profiles per trial for each subject, showed that while in all trials ~90% of the variance can  
154 be explained by the first PC, there is a slow but consistent rise in the number of PCs that explain  
155 more than 1% of the variance in the joint velocity profiles (Figure 3C). The manipulative  
156 complexity, suggested by Belić and Faisal (2015) as way to quantify complexity for a given number  
157 of PCs on a fixed scale ( $C = 1$  implies that all PCs contribute equally, and  $C = 0$  if one PC explains  
158 all data variability), showed cleaner trajectory with the same trend (Figure 3D). This suggests that  
159 over trials subjects use more degrees of freedom in their movement.

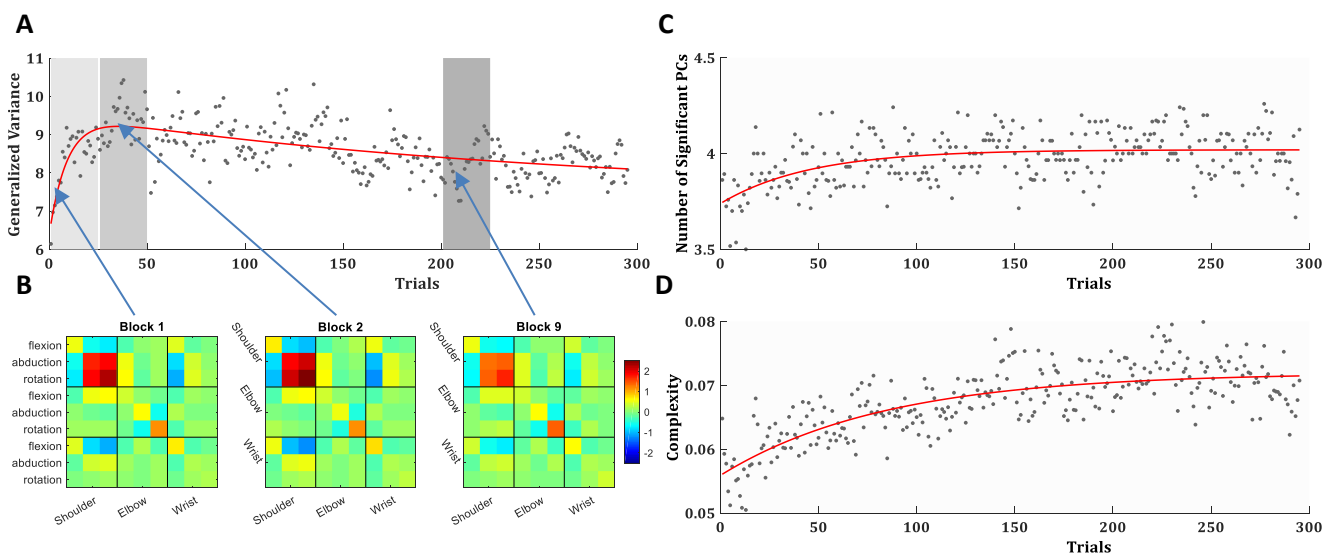

**Figure 3. Variance and Complexity.** (A) The trial-by-trial generalized variance (GV), with a double-exponential fit (red curve). (B) The variance covariance matrix of the right arm joints velocity profiles averaged across subjects and trials over the initial block (trials 1-25), the second block (trials 26-50), in which the GV peaks, and first block after learning plateau (block 9, trials 201-225). The order of the DoF for each joint and the colorbar are the same as in Figure 2. (C) The number of principal components (PCs) that explain more than 1% of the variance in the velocity profiles of all joints in a single trial, with an exponential fit (red curve). (D) The manipulative complexity (Belić and Faisal, 2015), with an exponential fit (red curve). (A,C,D) Averaged across all subjects over all trials.

160

161 As a measure of task  
 162 performance in body space,  
 163 we defined a measure of  
 164 Velocity Profile Error (VPE)  
 165 for each joint in each trial  
 166 (see methods). For all joints,  
 167 VPE showed a clear pattern  
 168 of decay over trials in an  
 169 exponential learning curve  
 170 (Figure 4A). A proximal-to-  
 171 distal gradient in the time  
 172 constant of these learning  
 173 curves was observed across  
 174 the right arm, from the  
 175 shoulder to the elbow and  
 176 the wrist rotation which  
 177 showed very slow learning  
 178 (the other wrist angles had  
 179 very low VPE from the start,  
 180 thus did not learn much).  
 181 Intertrial variability in joint  
 182 movement was measured  
 183 over the VPEs in each block.  
 184 Learning was also evident in  
 185 the decay over learning of  
 186 the VPE intertrial variability  
 187 over most joints across the  
 188 body (Figure 4B).

### 189 Inter-subject differences 190 in variability and learning

191 We found  
 192 substantial differences  
 193 between subjects in their  
 194 initial errors, final errors,  
 195 intertrial variability, and  
 196 learning, which are  
 197 overlooked in the group average results. One subject, who had low initial errors, showed no

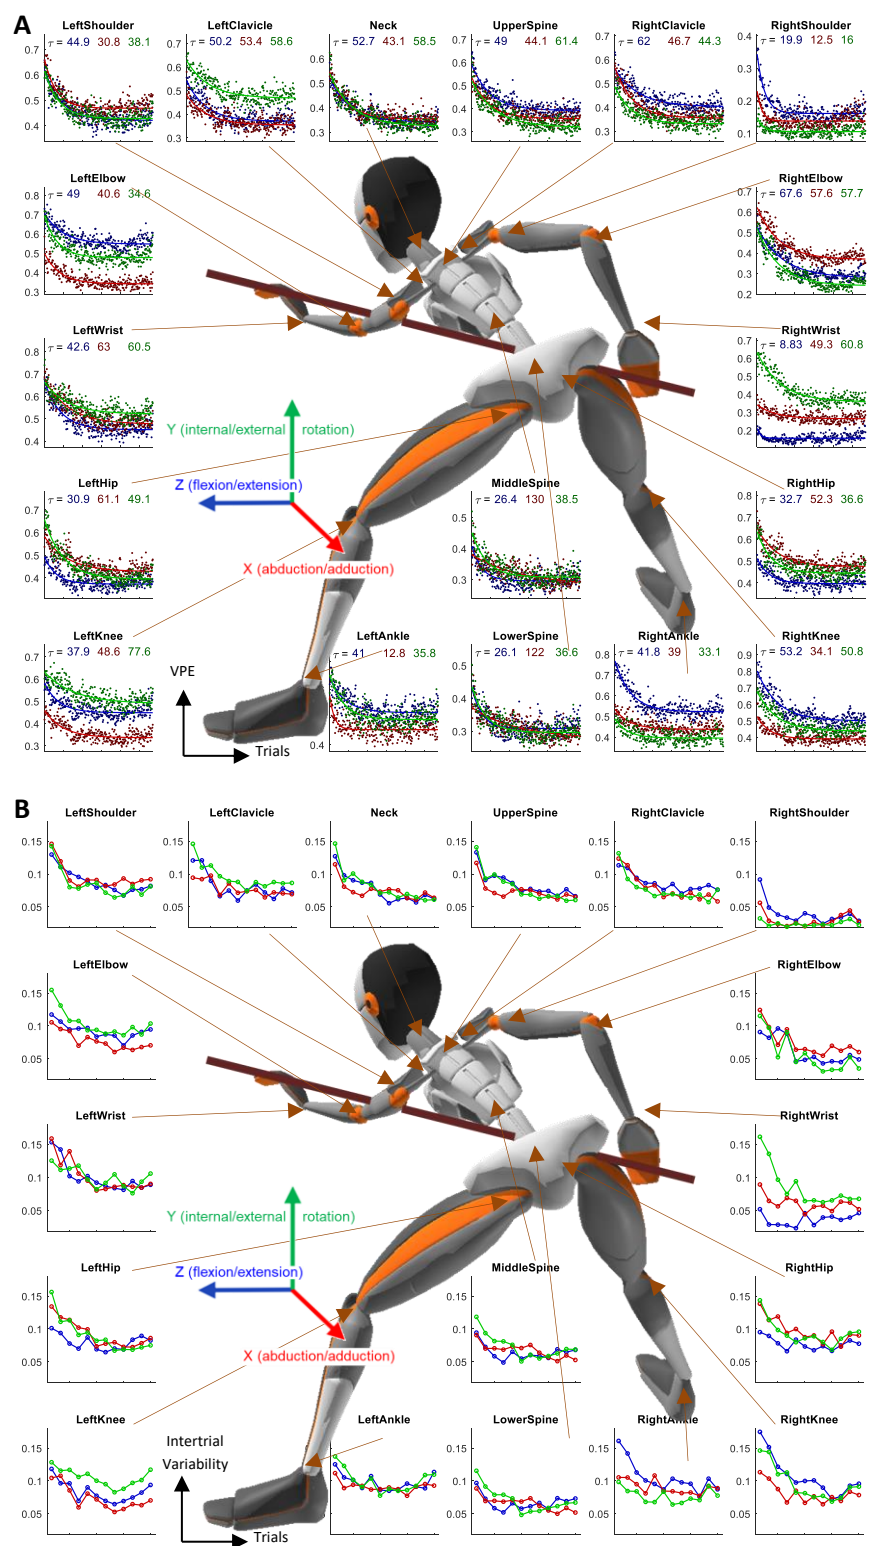

**Figure 4. Learning over Joints.** (A) Velocity Profile Error (VPE) reduction across all joints. The trial-by-trial VPE for all 3 DoF of all joints, averaged across all subjects, with an exponential fit. The time constants of the fits are reported under the title. The color code of the DoF is the same as in figure 2 (blue: flexion/extension; red: abduction/adduction; green: internal/external rotation). (B) Velocity Profile Error (VPE) intertrial variability over blocks of 25 trials, averaged across all subjects.



198 learning, i.e. did not reduce her error over trials from the first block (trials 1-25) to the learning  
 199 plateau (trials 201-300). For all other subjects the final errors were smaller than the initial errors  
 200 (Figure 5A). There was a significant correlation between the initial and the final errors, meaning  
 201 subjects with higher initial errors tended to have higher final errors as well.

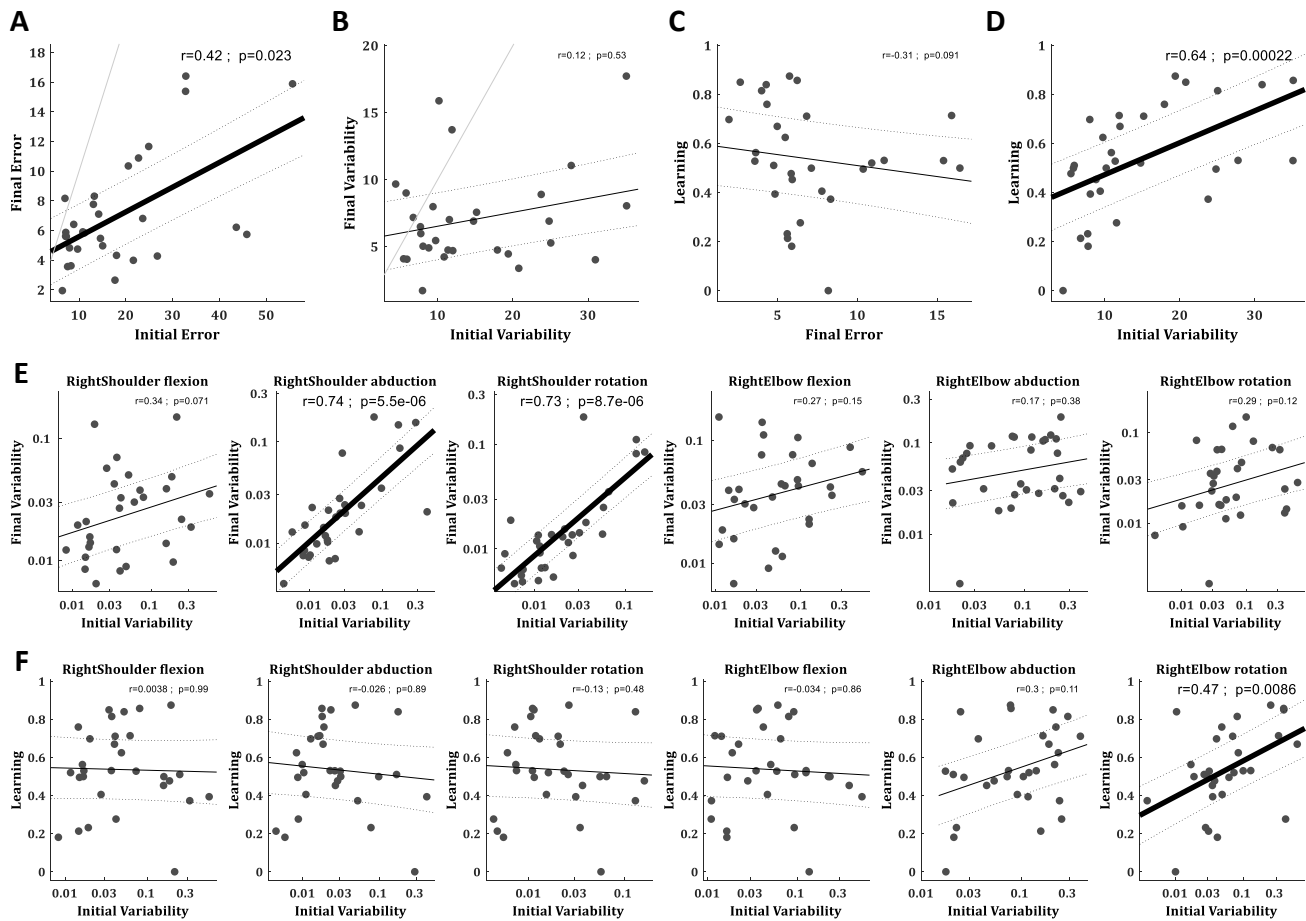

**Figure 5. Variability and learning across subjects.** (A) Correlation between subjects' mean absolute directional error over the first block (trials 1-25) and the learning plateau (trials 201-300). (B) Correlation between subjects' directional variability over first block (corrected for learning trend, see text) and over the learning plateau (C) Correlation between subjects' mean absolute directional error over the learning plateau and their learning (D) Correlation between subjects' directional variability over the first block (corrected for learning trend, see text) and their learning (E) Correlation between subjects' VPE variability (in logarithmic scale) over the first block and the learning plateau for the right arm joints. (F) Correlation between subjects' VPE variability (in logarithmic scale) over the first block and their learning for the right arm joints. (A-F) Correlation values are Spearman rank correlation, regression lines are linear fits with 95% confidence intervals.

202

203 While over learning most subjects decreased their intertrial variability in the outcome (ball  
 204 direction; Figure 1H & 5B) there was some tendency (though non-significant) for subjects who  
 205 were initially more variable to be also more variable after learning (Figure 5B). The intertrial  
 206 variability of the joint velocity profiles, which also decreased over learning (Figure 4B), showed a  
 207 clearer and stronger correlation between the initial and the final intertrial variability (Figure 5E &  
 208 S1 Fig). While this phenomenon was observed in various joints across the body, and dominant in  
 209 the abduction across the spine joints, it was most dominant in the right shoulder abduction and

210 rotation, the two joint angles that do most of the movement and carry most of its variance (Figure  
211 2).

212 Learning was defined as the difference between the initial error (over the first block: trials  
213 1-25) and the final error (over the learning plateau: trials 201-300) normalized by the initial error.  
214 There was no significant correlation between the learning and the final error (as subjects who started  
215 worse could have learn more but still not perform better after learning), but there was a trend that  
216 more learning leads to smaller final errors (Figure 5C). We tested if higher levels of initial task-  
217 relevant motor variability (variability in the directional error of the target ball) in this complex real-  
218 world task could predict faster learning across individual, as found in simple lab experiments (Wu  
219 et al., 2014). We indeed found that individuals with higher intertrial variability in the directional  
220 error of the target ball over the first block showed more learning (Spearman rank correlation  $r=0.64$ ,  
221  $p<0.001$ ; Figure 5D). Importantly, this is the corrected intertrial variability (as in Figure 1I) which  
222 is calculated over the residuals from a regression line fitted to the ball direction to correct for the  
223 learning that is happening within the block. As a control we also tested for correlation with the  
224 initial variability in the target ball velocity, task-irrelevant motor variability, and found no  
225 correlation (Spearman rank correlation  $r=0.06$ ,  $p=0.77$ ). Next, we tested the link between learning  
226 and initial variability over the joint velocity profiles of the right arm (Figure 5F). We found that the  
227 only joint angle where the intertrial variability showed significant correlation to learning was the  
228 right elbow rotation (Spearman rank correlation  $r=0.47$ ,  $p=0.0086$ ), which is the arm supination.  
229 We further tested the link over the full body kinematics (S2 Fig) and found no other joint that  
230 showed this correlation. Thus, while learning leads to overall reduction in movement variability,  
231 only initial variability in specific, task-relevant, dimensions can facilitate/predict learning.

## 232 Discussion

233 In this paper we introduce a new paradigm for studying naturalistic motor learning during  
234 whole-body movement in a complex real-world motor skill task. Our results present new insights  
235 into motor learning in the real-world. While the learning curves in this in-the-wild paradigm are  
236 within the same range of those reported in reductionistic motor adaptation tasks (e.g. McDougle et  
237 al., 2015; Smith et al., 2006) we find that this learning is taking place not only in the task relevant  
238 joints but across the entire body. Also, we found that task relevant initial variability in the ball  
239 direction (movement outcome) can predict learning, like in toy tasks (Wu et al., 2014), and so can  
240 the initial variability in the right arm supination which is the task relevant joint angle variability.

241 While pushing towards real-world neuroscience, we started here with a relatively  
242 constrained version of the real-world task, asking subjects to perform repeated trials of the same  
243 pool shot. This was to enable analysis using well developed methods of laboratory studies in toy-  
244 tasks. Nonetheless, it is a major step in the direction of a naturalistic study. First, we allow full-

245 body unconstrained movement. Second, we do not use any artificial go cue and allow self-paced  
246 movement and as many preparatory movements as the subject needs for each shoot. Third, subjects  
247 receive natural somatosensory feedback. And last, we do not perturb the feedback to induce  
248 learning.

### 249 **Fundamentals of real-world motor learning**

250 Across all subjects, we found that motor learning is a holistic process - the body is affected  
251 as a whole from learning the task. This was evident in the decrease in the VPE and the intertrial  
252 variability over learning (Figure 4). This result should not come as a surprise considering decades  
253 of research in sport science showing this relationship. For example, baseball pitcher's torso, pelvis,  
254 and leg movements are directly associated with ball velocity (Kageyama et al., 2014; Oliver and  
255 Keeley, 2010; Stodden et al., 2006). Recently it was also demonstrated with full-body motion  
256 capture in a ball throwing task (Maselli et al., 2017). And yet, unlike baseball pitches, basketball  
257 throws, or any unconstrained overarm throw, where the whole body is moving, in a pool shot the  
258 shooting arm is doing most of the movement and there is very little body movement. Thus, the  
259 whole-body learning is not trivial and suggestive that even in arm movement toy-tasks there is a  
260 whole-body learning aspect which is overlooked.

261 We also found a proximal-to-distal gradient in the learning rates over the right arm joints  
262 (Figure 4A). This is especially interesting in light of the well-known phenomenon of proximal-to-  
263 distal sequence in limb movements in sports science (Herring and Chapman, 1992) and in  
264 rehabilitation (Twitchell, 1951). While there are records of proximal-to-distal sequence at multiple  
265 time scales (Serrien and Baeyens, 2017), our results are the first to suggest that this gradient also  
266 occur over repetitions as part of the learning process.

### 267 **Variability & learning**

268 Intertrial variability is a fundamental characteristic of human movements and its underling  
269 neural activity (for review see Faisal et al., 2008). It was recently reported that individuals exhibit  
270 distinct magnitudes of movement variability, which are consistent across movements and effectors,  
271 suggesting an individual traits in movement variability (Haar et al., 2017). Our results show that  
272 subjects who were initially more variable tended to be also more variable after learning in many  
273 joints across the body (Figure 5E & S1 Fig) and specifically in those of right shoulder that carry  
274 most of the variance in the movement. This supports the notion that there is an individual trait in  
275 movement variability.

276 Intertrial kinematic variability is also thought to be critical for motor learning (e.g. Braun  
277 et al., 2009; Dhawale et al., 2017; Herzfeld and Shadmehr, 2014; Teo et al., 2011; Wilson et al.,  
278 2008). It was suggested that individuals with higher levels of task-relevant movement variability  
279 exhibit faster motor learning in both skill learning and motor adaptation error-based paradigms (Wu  
280 et al., 2014). The failures to reproduce this result in visuomotor adaptation studies (He et al., 2016;

281 Singh et al., 2016), led to the idea that experiments with task-relevant feedback (which is common  
282 in visuomotor studies) emphasize execution noise over planning noise, whereas measurements  
283 made without feedback (as in Wu et al., 2014) may primarily reflect planning noise (Dhawale et  
284 al., 2017). This is in-line with a recent modeling work in a visuomotor adaptation study (with task-  
285 relevant feedback) in which subjects with higher planning noise showed faster learning, but the  
286 overall movement variability was dominated by execution noise that was negatively correlated with  
287 learning (van der Vliet et al., 2018). In our task there were no manipulations or perturbations, thus,  
288 task-relevant feedback was fully available to the participants. On the other hand, in real-world there  
289 is no baseline variability, and the variability was measured during early learning and therefore is  
290 probably dominated by planning noise, as subjects explore, regardless of the visual feedback.  
291 Indeed, subjects with higher variability in the target ball direction over the first block showed higher  
292 learning rates (Figure 5D). Our results straighten the link between variability and learning and are  
293 the first to show that it applies to real-world tasks. Moreover, the only joint angle that showed  
294 significant correlation between initial variability and learning was the right elbow rotation (Figure  
295 5F & S2 Fig). Following the idea that task-relevant variability predicts learning, it would suggest  
296 that the right elbow rotation is the task-relevant joint angle to adjust during initial learning of a  
297 simple pool shoot. Indeed, guide books for pool and billiards emphasize that while shooting one  
298 should keep one's body still and move only the back (right) arm from the elbow down. While the  
299 elbow flexion movement gives the power to the shoot, the arm supination (also known as 'screwing'  
300 in billiards and measured by the elbow rotation in our IMUs setup) maintains the direction of the  
301 cue.

## 302 **Conclusions**

303 In this study we demonstrate the feasibility and importance of studying human  
304 neuroscience in-the-wild, and specifically in naturalistic real-world skill tasks. While finding  
305 similarities in learning structure between our real-world paradigm and lab-based motor learning  
306 studies, we highlight crucial differences, namely, real-world motor learning is a holistic full-body  
307 process. Looking at the motor behavior over learning across the entire body enabled us to explore  
308 the relationship between variability and learning and define task relevant variability that can  
309 facilitate learning.

## 310 **Methods**

311 *Ethics statement.* All experimental procedures were approved by Imperial College  
312 Research Ethics Committee and performed in accordance with the declaration of Helsinki. All  
313 subjects gave informed consent prior participating to the study.

314 *Experimental Setup and Design.* 30 right-handed healthy human volunteers with normal or  
315 corrected-to-normal visual acuity (12 women and 18 men, aged  $24\pm 3$ ) participated in the study.  
316 The volunteers, who had little to no previous experience with playing billiards, performed 300  
317 repeated trials where the cue ball (white) and the target ball (red) were placed in the same locations  
318 and the subject was asked to shoot the target ball towards the pocket of the far-left corner ([Figure](#)  
319 [1A](#)). The trials were split into 6 sets of 50 trials with a short break in-between. For the data analysis  
320 we further split each set into two blocks of 25 trials each, resulting in 12 blocks. During the entire  
321 learning process, we recorded the subjects' full body movements with a motion tracking 'suit' of  
322 17 wireless inertial measurement units (IMUs; [Figure 1B](#)). Brain activity was recorded with  
323 wireless EEG, neural findings reported elsewhere (Haar and Faisal, 2020). The balls on the pool  
324 table were tracked with a high-speed camera (Dalsa Genie Nano) to assess the subjects' success in  
325 the game and to analyze the changes throughout learning, not only in the body movement and brain  
326 activity but also in its outcome – the ball movement ([Figure 1C](#)).

327 *Full-Body Motion Tracking.* Kinematic data were recorded at 60 Hz using a wearable  
328 motion tracking 'suit' of 17 wireless IMUs (Xsens MVN Awinda, Xsens Technologies BV,  
329 Enschede, The Netherlands). Data acquisition was done via a graphical interface (MVN Analyze,  
330 Xsens technologies BV, Enschede, The Netherlands). The Xsens joint angles and position data were  
331 exported as XML files and analyzed using a custom software written in MATLAB (R2017a, The  
332 MathWorks, Inc., MA, USA). The Xsens full body kinematics were extracted in joint angles in 3  
333 degrees of freedom for each joint that followed the International Society of Biomechanics (ISB)  
334 recommendations for Euler angle extractions of Z (flexion/extension), X (abduction/adduction) Y  
335 (internal/external rotation).

336 *Movement Velocity Profile Analysis.* From the joint angles we extracted the velocity  
337 profiles of all joints in all trials. We defined the peak of the trial as the peak of the average absolute  
338 velocity across the DoFs of the right shoulder and the right elbow. We aligned all trials around the  
339 peak of the trial and cropped a window of 1 sec around the peak for the analysis of joint angles and  
340 velocity profiles.

341 *Statistical Analysis.* Trial by trial learning curves were fitted with a single or a double  
342 exponential learning curve using matlab fit function.

343 As a measure of task performance in body space, correlation distances (one minus Pearson  
344 correlation coefficient) were calculated between the velocity profile of each joint in each trial to  
345 the velocity profiles of that joint in all successful trials. The mean over these correlation distances  
346 produced a single measure of Velocity Profile Error (VPE) for each joint in each trial.

$$347 \quad VPE_i = \frac{\sum_s^{N_{scs}} corrDist(velProf_i, velProf_s)}{N_{scs}}$$

348 Thus, VPE in trial  $i$  was the sum of the correlation distances between the velocity profile  
349 in trial  $i$  ( $velProf_i$ ) and the velocity profiles in successful trials  $s$  ( $velProf_s$ ), divided by the  
350 number of successful trials ( $N_{scs}$ ).

351 For measuring success rates and intertrial variability we divided the trials into blocks of 25  
352 trials by dividing each experimental set of 50 trials to two blocks. This was done to increase the  
353 resolution in time from calculating those on the full sets. To improve robustness and account for  
354 outliers, we fitted the errors in each block with a t-distribution and used the location and scale  
355 parameters ( $\mu$  and  $\sigma$ ) as the blocks' center and variability measures. Similarly, all correlations  
356 between error, variability, and learning are Spearman's rank correlation coefficients. Regression  
357 lines are based on linear regression fits (in logarithmic scale for VPE variability) and are presented  
358 with 95% confidence intervals.

359

## 360 **References**

- 361 Abe, M.O., and Sternad, D. (2013). Directionality in distribution and temporal structure of variability in  
362 skill acquisition. *Front. Hum. Neurosci.* 7, 225.
- 363 van Beers, R.J., van der Meer, Y., and Veerman, R.M. (2013). What Autocorrelation Tells Us about Motor  
364 Variability: Insights from Dart Throwing. *PLoS One* 8, e64332.
- 365 Belić, J.J., and Faisal, A.A. (2015). Decoding of human hand actions to handle missing limbs in  
366 neuroprosthetics. *Front. Comput. Neurosci.* 9, 27.
- 367 Braun, D. a, Aertsen, A., Wolpert, D.M., and Mehring, C. (2009). Motor Task Variation Induces Structural  
368 Learning. *Curr. Biol.* 19, 352–357.
- 369 Clerget, E., Poncin, W., Fadiga, L., and Olivier, E. (2012). Role of Broca's Area in Implicit Motor Skill  
370 Learning: Evidence from Continuous Theta-burst Magnetic Stimulation. *J. Cogn. Neurosci.* 24, 80–92.
- 371 Cohen, R.G., and Sternad, D. (2009). Variability in motor learning: relocating, channeling and reducing  
372 noise. *Exp. Brain Res.* 193, 69–83.
- 373 Dhawale, A.K., Smith, M.A., and Ölzveczky, B.P. (2017). The Role of Variability in Motor Learning. *Annu.*  
374 *Rev. Neurosci.* 40, 479–498.
- 375 Diedrichsen, J., Hashambhoy, Y., Rane, T., and Shadmehr, R. (2005). Neural correlates of reach errors. *J.*  
376 *Neurosci.* 25, 9919–9931.
- 377 Faisal, a A., Selen, L.P.J., and Wolpert, D.M. (2008). Noise in the nervous system. *Nat. Rev. Neurosci.* 9,  
378 292–303.
- 379 Faisal, A., Stout, D., Apel, J., and Bradley, B. (2010). The Manipulative Complexity of Lower Paleolithic

- 380 Stone Toolmaking. *PLoS One* 5, e13718.
- 381 Haar, S., Donchin, O., and Dinstein, I. (2015). Dissociating Visual and Motor Directional Selectivity Using  
382 Visuomotor Adaptation. *J. Neurosci.* 35, 6813–6821.
- 383 Haar, S., Donchin, O., and Dinstein, I. (2017). Individual Movement Variability Magnitudes Are Explained  
384 by Cortical Neural Variability. *J. Neurosci.* 37, 9076–9085.
- 385 He, K., Liang, Y., Abdollahi, F., Fisher Bittmann, M., Kording, K., and Wei, K. (2016). The Statistical  
386 Determinants of the Speed of Motor Learning. *PLOS Comput. Biol.* 12, e1005023.
- 387 Hecht, E.E., Gutman, D.A., Khreisheh, N., Taylor, S. V., Kilner, J., Faisal, A.A., Bradley, B.A., Chaminade, T.,  
388 and Stout, D. (2014). Acquisition of Paleolithic toolmaking abilities involves structural remodeling to  
389 inferior frontoparietal regions. *Brain Struct. Funct.* 220, 2315–2331.
- 390 Herring, R.M., and Chapman, A.E. (1992). Effects of changes in segmental values and timing of both torque  
391 and torque reversal in simulated throws. *J. Biomech.* 25, 1173–1184.
- 392 Herzfeld, D.J., and Shadmehr, R. (2014). Motor variability is not noise, but grist for the learning mill. *Nat.*  
393 *Neurosci.* 17, 149–150.
- 394 Howard, I.S., Wolpert, D.M., and Franklin, D.W. (2015). The Value of the Follow-Through Derives from  
395 Motor Learning Depending on Future Actions. *Curr. Biol.* 25, 397–401.
- 396 Ingram, J.N., and Wolpert, D.M. (2011). Naturalistic approaches to sensorimotor control. *Prog. Brain Res.*  
397 191, 3–29.
- 398 Kageyama, M., Sugiyama, T., Takai, Y., Kanehisa, H., and Maeda, A. (2014). Kinematic and Kinetic Profiles  
399 of Trunk and Lower Limbs during Baseball Pitching in Collegiate Pitchers. *J. Sports Sci. Med.* 13, 742–750.
- 400 Krakauer, J.W., Pine, Z., Ghilardi, M., and Ghez, C. (2000). Learning of visuomotor transformations for  
401 vectorial planning of reaching trajectories. *J. Neurosci.* 20, 8916–8924.
- 402 Ma, L., Narayana, S., Robin, D.A., Fox, P.T., and Xiong, J. (2011). Changes occur in resting state network of  
403 motor system during 4weeks of motor skill learning. *Neuroimage* 58, 226–233.
- 404 Maselli, A., Dhawan, A., Cesqui, B., Russo, M., Lacquaniti, F., and d’Avella, A. (2017). Where Are You  
405 Throwing the Ball? I Better Watch Your Body, Not Just Your Arm! *Front. Hum. Neurosci.* 11, 505.
- 406 Mazzoni, P., and Krakauer, J. (2006). An Implicit Plan Overrides an Explicit Strategy during Visuomotor  
407 Adaptation. *J. Neurosci.* 26, 3642–3645.
- 408 McDougale, S.D., Bond, K.M., and Taylor, J.A. (2015). Explicit and Implicit Processes Constitute the Fast and  
409 Slow Processes of Sensorimotor Learning. *J. Neurosci.* 35, 9568–9579.
- 410 Oliver, G.D., and Keeley, D.W. (2010). Pelvis and torso kinematics and their relationship to shoulder  
411 kinematics in high-school baseball pitchers. *J. Strength Cond. Res.* 24, 3241–3246.
- 412 Ono, Y., Noah, J.A., Zhang, X., Nomoto, Y., Suzuki, T., Shimada, S., Tachibana, A., Bronner, S., and Hirsch, J.  
413 (2015). Motor learning and modulation of prefrontal cortex: an fNIRS assessment. *J. Neural Eng.* 12,  
414 066004.
- 415 Reis, J., Schambra, H.M., Cohen, L.G., Buch, E.R., Fritsch, B., Zarahn, E., Celnik, P.A., and Krakauer, J.W.  
416 (2009). Noninvasive cortical stimulation enhances motor skill acquisition over multiple days through an  
417 effect on consolidation. *Proc. Natl. Acad. Sci. U. S. A.* 106, 1590–1595.
- 418 Sampaio-Baptista, C., Scholz, J., Jenkinson, M., Thomas, A.G., Filippini, N., Smit, G., Douaud, G., and  
419 Johansen-Berg, H. (2014). Gray matter volume is associated with rate of subsequent skill learning after a  
420 long term training intervention. *Neuroimage* 96, 158–166.
- 421 Sampaio-Baptista, C., Filippini, N., Stagg, C.J., Near, J., Scholz, J., and Johansen-Berg, H. (2015). Changes in  
422 functional connectivity and GABA levels with long-term motor learning. *Neuroimage* 106, 15–20.
- 423 Scholz, J., Klein, M.C., Behrens, T.E., and Johansen-Berg, H. (2009). Training induces changes in white-  
424 matter architecture. *Nat Neurosci* 12, 1370–1371.
- 425 Serrien, B., and Baeyens, J.P. (2017). The proximal-to-distal sequence in upper-limb motions on multiple  
426 levels and time scales. *Hum. Mov. Sci.*
- 427 Shadmehr, R., and Mussa-Ivaldi, F.A. (1994). Adaptive representation of dynamics during learning of a

- 428 motor task. *J. Neurosci.* *14*, 3208–3224.
- 429 Shmuelof, L., Krakauer, J.W., and Mazzoni, P. (2012). How is a motor skill learned? Change and invariance  
430 at the levels of task success and trajectory control. *J. Neurophysiol.* *108*, 578–594.
- 431 Singh, P., Jana, S., Ghosal, A., and Murthy, A. (2016). Exploration of joint redundancy but not task space  
432 variability facilitates supervised motor learning. *Proc. Natl. Acad. Sci.* *113*, 14414–14419.
- 433 Smith, M.A., Ghazizadeh, A., and Shadmehr, R. (2006). Interacting adaptive processes with different  
434 timescales underlie short-term motor learning. *PLoS Biol.* *4*, e179.
- 435 Stodden, D.F., Langendorfer, S.J., Fleisig, G.S., and Andrews, J.R. (2006). Kinematic Constraints Associated  
436 With the Acquisition of Overarm Throwing Part I. *Res. Q. Exerc. Sport* *77*, 417–427.
- 437 Taylor, J. a, Krakauer, J.W., and Ivry, R.B. (2014). Explicit and implicit contributions to learning in a  
438 sensorimotor adaptation task. *J. Neurosci.* *34*, 3023–3032.
- 439 Teo, J.T.H., Swayne, O.B.C., Cheeran, B., Greenwood, R.J., and Rothwell, J.C. (2011). Human theta burst  
440 stimulation enhances subsequent motor learning and increases performance variability. *Cereb. Cortex* *21*,  
441 1627–1638.
- 442 Thomik, A.A.C. (2016). On the structure of natural human movement. Imperial College London.
- 443 Twitchell, T.E. (1951). The restoration of motor function following hemiplegia in man. *Brain* *74*, 443–480.
- 444 van der Vliet, R., Frens, M.A., de Vreede, L., Jonker, Z.D., Ribbers, G.M., Selles, R.W., van der Geest, J.N.,  
445 and Donchin, O. (2018). Individual Differences in Motor Noise and Adaptation Rate Are Optimally Related.  
446 *Eneuro* *5*, ENEURO.0170-18.2018.
- 447 Wilks, S.S. (1932). Certain Generalizations in the Analysis of Variance. *Biometrika* *24*, 471.
- 448 Wilson, C., Simpson, S.E., van Emmerik, R.E. a, and Hamill, J. (2008). Coordination variability and skill  
449 development in expert triple jumpers. *Sports Biomech.* *7*, 2–9.
- 450 Wolpert, D.M., Diedrichsen, J., and Flanagan, J.R. (2011). Principles of sensorimotor learning. *Nat. Rev.*  
451 *Neurosci.* *12*, 739–751.
- 452 Wu, H.G., Miyamoto, Y.R., Gonzales Castro, L.N., Ölveczky, B.C., and Smith, M.A. (2014). Temporal  
453 structure of motor variability is dynamically regulated and predicts motor learning ability. *Nat. Neurosci.*  
454 *17*, 312–321.
- 455 Yokoi, A., Arbuckle, S.A., and Diedrichsen, J. (2018). The role of human primary motor cortex in the  
456 production of skilled finger sequences. *J. Neurosci.* *38*, 1430–1442.
- 457



## 458 Supporting Information

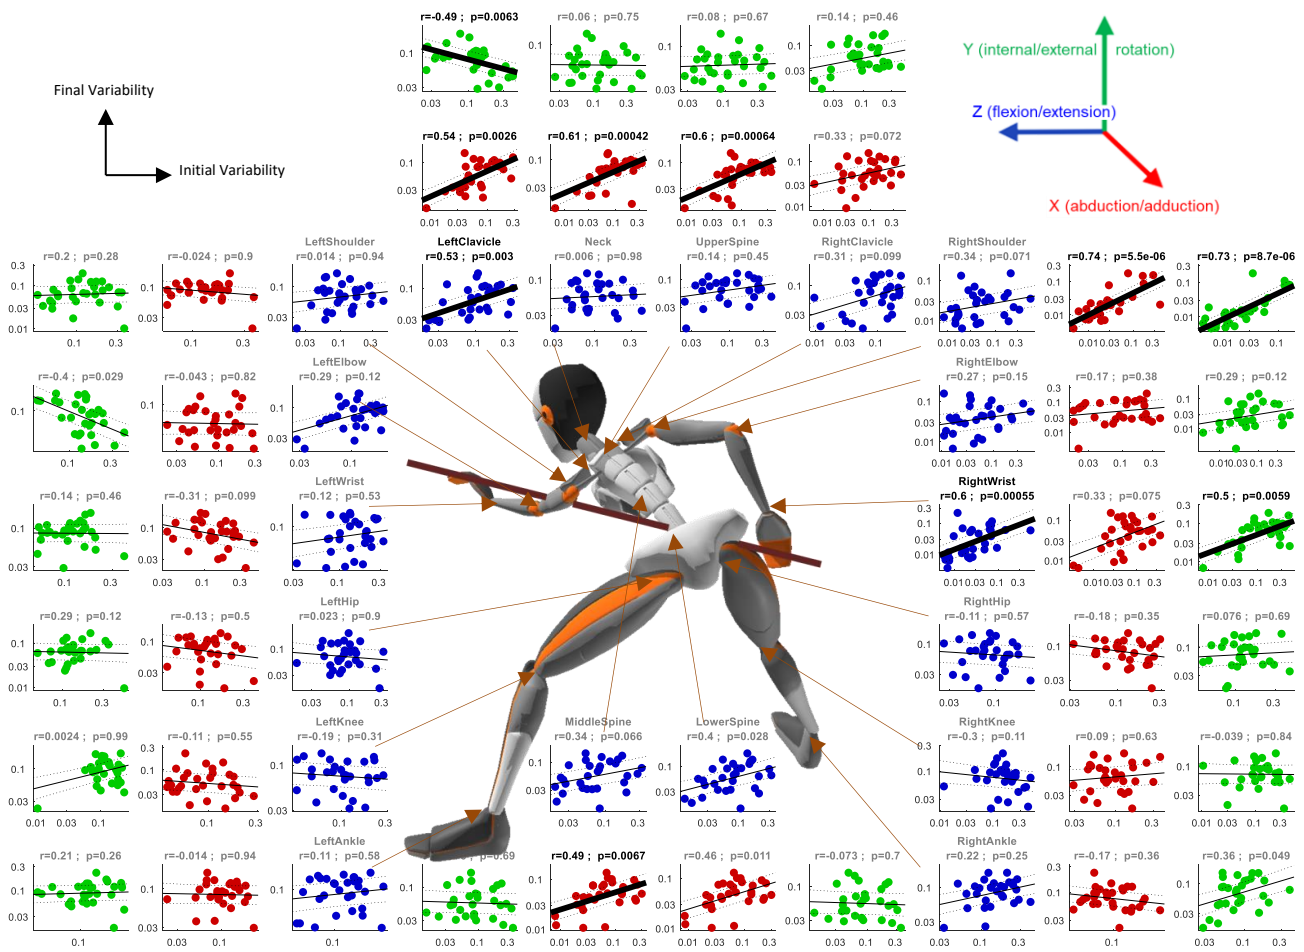

**S1 Fig.** Correlation between subjects' VPE variability over the first block and over the learning plateau. Presented for all joints in 3 degrees of freedom (DoF) for each joint (blue: flexion/extension, red: abduction/adduction; green: internal/external rotation). Subjects' VPE variability is in logarithmic scale. Correlation values are Spearman rank correlation, regression lines are linear.
